# Supplementary material for: Practitioner-led, peer-group sports intervention combined with a context-focused intervention for children with cerebral palsy: a protocol of a feasibility randomised clinical trial
Source: HighWire-hosted journal article supplement (doi:10.1136/bmjopen-2022-068486), 2023-01-01
Supplement: bmjopen-2022-068486supp002_data_supplement.pdf [file bmjopen-2022-068486supp002_data_supplement.pdf]

## Supplemental Material 2- Feasibility questionnaires

| For parents and caregivers                                                                                                                                                                                |                                                                                                                                                                                                                                                                                                                                                                                                                                                                                                                          |
|-----------------------------------------------------------------------------------------------------------------------------------------------------------------------------------------------------------|--------------------------------------------------------------------------------------------------------------------------------------------------------------------------------------------------------------------------------------------------------------------------------------------------------------------------------------------------------------------------------------------------------------------------------------------------------------------------------------------------------------------------|
| Feasibility measure                                                                                                                                                                                       | Questions                                                                                                                                                                                                                                                                                                                                                                                                                                                                                                                |
| Willingness to participate in an RCT*                                                                                                                                                                     | <p><i>Would you (or would you recommend that others) participate in a study that investigates the effectiveness of the Sports Stars and PREP interventions?</i></p> <p>( ) Yes ( ) No Why: _____</p>                                                                                                                                                                                                                                                                                                                     |
| Acceptability of random allocation                                                                                                                                                                        | <p><i>Your child was allocated to the XX group of this study (Sports Stars or Sport Stars + PREP), did satisfied with this allocation? (Asked after the intervention)</i></p> <p>( ) Yes ( ) No ( ) No preference</p>                                                                                                                                                                                                                                                                                                    |
| Possible contamination between the groups                                                                                                                                                                 | <p><i>Have you talked to other participants in this study about the intervention they are receiving?</i></p> <p>( ) Yes ( ) No</p> <p>If so:</p> <p><i>Did your attitude towards the intervention change after talking to one of the participants in the other group?</i></p> <p>( ) Yes ( ) No</p> <p><i>Are any of the participants in the other group aware of the type of intervention you were receiving in this study?</i></p> <p>( ) Yes ( ) No</p>                                                               |
| Treatment satisfaction                                                                                                                                                                                    | <i>Detailed in the next pages</i>                                                                                                                                                                                                                                                                                                                                                                                                                                                                                        |
| Difficulty in understanding the intervention being provided                                                                                                                                               | <p><i>How easy or difficult do you think it was for your child to understand the instructions given by the therapists during the Sports Stars activities?</i></p> <p>( ) Very easy, ( ) Easy, ( ) Neither easy nor difficult ( ) Difficult ( ) Very difficult</p> <p><i>How easy or difficult was it for you and your child to understand the instructions given by the therapists during the PREP intervention?</i></p> <p>( ) Very easy, ( ) Easy, ( ) Neither easy nor difficult ( ) Difficult ( ) Very difficult</p> |
| *Considering that the recruitment strategy is convenience sampling, the rate of willingness to participate in an RCT will not be calculated. Instead, the reasons for non-participation will be reported. |                                                                                                                                                                                                                                                                                                                                                                                                                                                                                                                          |

| For the research assistant             |                                                                                                               |
|----------------------------------------|---------------------------------------------------------------------------------------------------------------|
| Feasibility measure                    | Questions                                                                                                     |
| Eligibility and recruitment            | How many participants were screened for this study?                                                           |
|                                        | How many of them were eligible?                                                                               |
|                                        | How many consented to participate?                                                                            |
|                                        | How many refused to participate? Why?                                                                         |
| Acceptability of screening procedures  | Were there any difficulties or challenges in screening and recruiting participants last week?                 |
|                                        | ( ) Yes ( ) No                                                                                                |
|                                        | In the case of affirmative answers:<br>2) What were the difficulties and challenges?                          |
| Feasibility of evaluating outcomes     | What percentage of data was missing at each assessment timepoint (baseline, post-intervention and follow-up)? |
| For the blinded assessor               |                                                                                                               |
| Feasibility of assessor blinding       | Did you receive any information indicating to which group a participant was assigned?                         |
|                                        | ( ) Yes ( ) No                                                                                                |
|                                        | If yes, how many participants did this occur for?                                                             |
| Data collected from attendance records |                                                                                                               |
| Intervention adherence                 | What percentage of enrolled children completed the intervention?                                              |
|                                        | How many individual's were absent during the 8-week intervention?                                             |
|                                        | How many total absences occurred?                                                                             |
|                                        | What were the reasons for absences?                                                                           |
| For the intervention therapist         |                                                                                                               |
| Implementation resources               | What resources were necessary to conduct Sports Stars?                                                        |
|                                        | What resources were necessary to conduct PREP?                                                                |
|                                        | Did you have difficulty accessing resources to provide either intervention?                                   |

Satisfaction questionnaire for the Sports Stars group.

| Satisfaction of children                                                                                                                                                                                                                                              | Did not like | I liked it a little | Really enjoyed |
|-----------------------------------------------------------------------------------------------------------------------------------------------------------------------------------------------------------------------------------------------------------------------|--------------|---------------------|----------------|
| What is your level of satisfaction about                                                                                                                                                                                                                              |              |                     |                |
| Intervention time (08:00am to 09:00am).                                                                                                                                                                                                                               |              |                     |                |
| The duration of the intervention (1 hour per session).                                                                                                                                                                                                                |              |                     |                |
| The period of the intervention (8 weeks).                                                                                                                                                                                                                             |              |                     |                |
| The total amount of intervention (8 hours)                                                                                                                                                                                                                            |              |                     |                |
| The place where the interventions took place (for example: the location of the court, the size of the court, the cleanliness of the bathrooms, among others).                                                                                                         |              |                     |                |
| The materials used during the activities (for example: balls, cones, disks, baskets, among others).                                                                                                                                                                   |              |                     |                |
| The practice of modified sports (for example: the activities developed; the interaction and participation between your child, the other participants and the therapists, the objectives of the activities, the formation of teams, among others).                     |              |                     |                |
| The practice of activities to be done with other children (for example: doing the relay races, the activities in pairs of throwing and receiving a ball, and during the practice of the modified sport, among others).                                                |              |                     |                |
| The therapists' interaction with you and your child (for example: the way they instruct you about the activities; the way they talk to your child before, during and after the interventions; among others).                                                          |              |                     |                |
| The way in which the therapist adapted the Sports Stars activities according to what your child was able to do (for example: when the therapist made the activity difficult if it was easy, or when he facilitated the activity when it was difficult, among others). |              |                     |                |
| The interaction between your child and the other children (for example: the communication between them and the other children during the intervention, the support between them during the activities).                                                               |              |                     |                |
| Your child's current skill level (in soccer, handball, basketball and athletics) when compared to before the intervention (for example: how far they can bounce a ball today compared to before the project, among others).                                           |              |                     |                |

Adapted from Feitosa et al.<sup>33</sup>

Satisfaction questionnaire for the Sports Stars + PREP group.

| Satisfaction of children                                                                                                                                                                                                                                                | Did not like | I liked it a little | Really enjoyed |
|-------------------------------------------------------------------------------------------------------------------------------------------------------------------------------------------------------------------------------------------------------------------------|--------------|---------------------|----------------|
| What is your level of satisfaction about                                                                                                                                                                                                                                |              |                     |                |
| Intervention time (08:00am to 10:00am).                                                                                                                                                                                                                                 |              |                     |                |
| The duration of the intervention (2 hours per session [PREP= 1 hour; Sports Stars = 1 hour]).                                                                                                                                                                           |              |                     |                |
| The period of the intervention (8 weeks).                                                                                                                                                                                                                               |              |                     |                |
| The place where the interventions took place (for example: the location of the court, the size of the court, the cleanliness of the bathrooms, among others).                                                                                                           |              |                     |                |
| The materials used during the activities (for example: balls, cones, disks, baskets, among others).                                                                                                                                                                     |              |                     |                |
| The practice of modified sports (for example: the activities developed; the interaction and participation between your child, the other participants and the therapists, the objectives of the activities, the formation of teams, among others)                        |              |                     |                |
| The practice of activities to be done with other children (for example: doing the relay races, the activities in pairs of throwing and receiving a ball, and during the practice of the modified sport, among others).                                                  |              |                     |                |
| The therapists' interaction with you and your child (for example: the way they instruct you about the activities; the way they talk to your child before, during and after the interventions; among others).                                                            |              |                     |                |
| The way in which the therapist adapted the Sports Stars activities according to what your child was able to do (for example: when the therapist made the activity difficult if it was easy, or when they facilitated the activity when it was difficult, among others). |              |                     |                |
| The therapist's ability to guide/assist you in planning and implementing strategies to overcome environmental barriers that limit your child's participation (during the PREP intervention)                                                                             |              |                     |                |
| The interaction between your child and the other children (for example: the communication between them and the other children during the intervention, the support between them during the activities).                                                                 |              |                     |                |
| The child's current skill level (in soccer, handball, basketball and athletics) when compared to before the intervention (for example: how far they can bounce a ball today compared to before the project, among others).                                              |              |                     |                |

Adapted from Feitosa et al.<sup>33</sup>
